# Supplementary material
Source: publisher figshare collection journal article supplement (https://acs.figshare.com/ndownloader/files/12824135)
Supplement: Supplementary file 1 [file 12824135]

## *Supporting information*

### **Catenulobactins A and B, Heterocyclic Peptides from Culturing *Catenuloplanes* sp. with Mycolic Acid-containing Bacterium**

Shotaro Hoshino,<sup>†</sup> Masahiro Ozeki,<sup>†</sup> Takayoshi Awakawa,<sup>†,‡</sup> Hiroyuki Morita,<sup>¶</sup> Hiroyasu Onaka,<sup>§,‡</sup>  
Ikuro Abe<sup>\*,†,‡</sup>

<sup>†</sup> Graduate School of Pharmaceutical Sciences, The University of Tokyo, Bunkyo-ku, Tokyo 113-0033, Japan

<sup>‡</sup> Collaborative Research Institute for Innovative Microbiology, The University of Tokyo, Yayoi 1-1-1, Bunkyo-ku, Tokyo 113-8657, Japan

<sup>¶</sup> Institute of Natural Medicine, University of Toyama, 2630-Sugitani, Toyama 930-0194, Japan

<sup>§</sup> Graduate School of Agricultural and Life Sciences, The University of Tokyo, Bunkyo-ku, Tokyo 113-8657, Japan

## **Table of contents**

|                                                                                                                |            |
|----------------------------------------------------------------------------------------------------------------|------------|
| <b>Figure S1.</b> $^1\text{H}$ NMR spectrum of <b>1</b> (500 MHz, $d_6$ -DMSO)                                 | <b>S3</b>  |
| <b>Figure S2.</b> $^{13}\text{C}$ NMR spectrum of <b>1</b> (125 MHz, $d_6$ -DMSO)                              | <b>S3</b>  |
| <b>Figure S3.</b> COSY spectrum of <b>1</b> (500 MHz, $d_6$ -DMSO)                                             | <b>S4</b>  |
| <b>Figure S4.</b> HMQC spectrum of <b>1</b> (500 MHz, $d_6$ -DMSO)                                             | <b>S4</b>  |
| <b>Figure S5.</b> HMBC spectrum of <b>1</b> (500 MHz, $d_6$ -DMSO)                                             | <b>S5</b>  |
| <b>Figure S6.</b> NOESY spectrum <b>1</b> (500 MHz, $d_6$ -DMSO)                                               | <b>S5</b>  |
| <b>Figure S7.</b> $^1\text{H}$ NMR spectrum of <b>2</b> (500 MHz in $d_6$ -DMSO)                               | <b>S6</b>  |
| <b>Figure S8.</b> $^{13}\text{C}$ NMR spectrum of <b>2</b> (125 MHz, $d_6$ -DMSO)                              | <b>S6</b>  |
| <b>Figure S9.</b> COSY spectrum of <b>2</b> (500 MHz in $d_6$ -DMSO)                                           | <b>S7</b>  |
| <b>Figure S10.</b> HMQC spectrum of <b>2</b> (500 MHz, $d_6$ -DMSO)                                            | <b>S7</b>  |
| <b>Figure S11.</b> HMBC spectrum of <b>2</b> (500 MHz, $d_6$ -DMSO)                                            | <b>S8</b>  |
| <b>Figure S12.</b> NOESY spectrum of <b>2</b> (500 MHz, $d_6$ -DMSO)                                           | <b>S8</b>  |
| <b>Figure S13.</b> IR spectrum of <b>1</b>                                                                     | <b>S9</b>  |
| <b>Figure S14.</b> IR spectrum of <b>2</b>                                                                     | <b>S9</b>  |
| <b>Figure S15.</b> $^{13}\text{C}$ NMR resonances of Thr residues of <b>1</b> , <b>2</b> and related compounds | <b>S10</b> |
| <b>Figure S16.</b> ESI-MS/MS analysis of <b>1</b>                                                              | <b>S11</b> |
| <b>Figure S17.</b> ESI-MS/MS analysis of <b>2</b>                                                              | <b>S12</b> |
| <b>Figure S18.</b> Outline for hydrolysis and chemical derivatization for GC-MS analysis                       | <b>S13</b> |
| <b>Figure S19.</b> Chiral-phase GC-MS analysis of <b>1</b> , <b>2</b> and amino acid standards                 | <b>S14</b> |
| <b>Figure S20.</b> HR-ESI-MS spectrum of <b>2</b> -Fe(III) complex                                             | <b>S15</b> |
| <b>Figure S21.</b> LC-MS charts of <b>2</b> treated with $\text{Fe}(\text{acac})_3$                            | <b>S16</b> |
| <b>References</b>                                                                                              | <b>S17</b> |

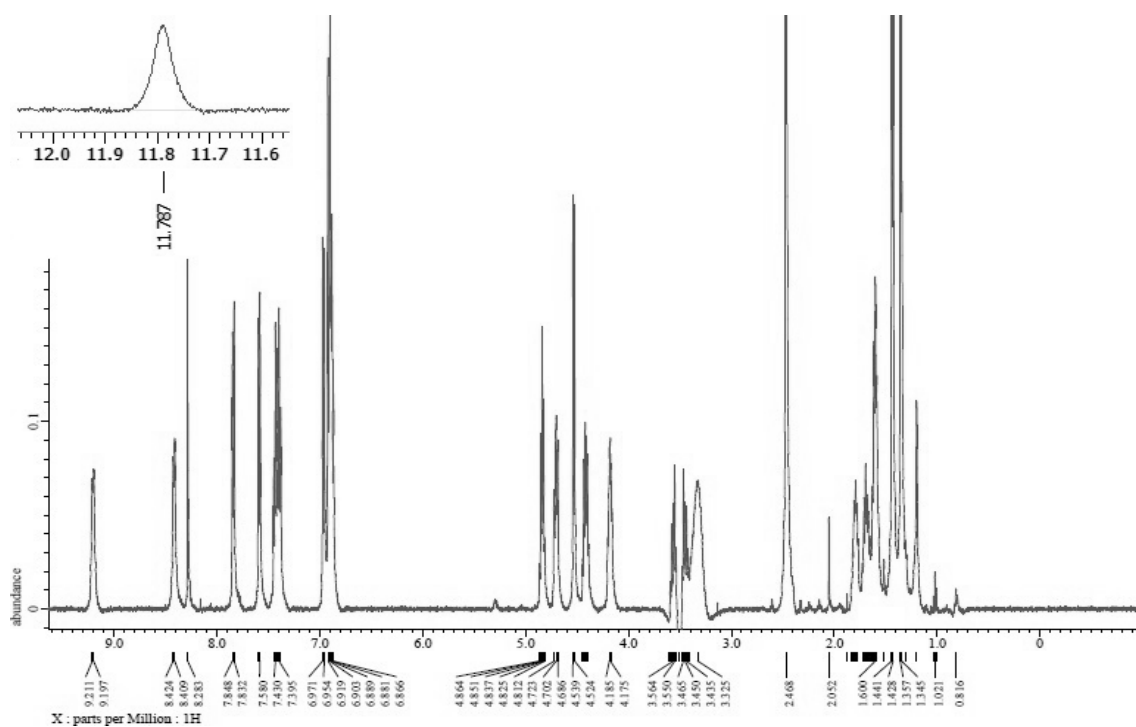

**Figure S1.** <sup>1</sup>H NMR spectrum of **1** (500 MHz, *d*<sub>6</sub>-DMSO)

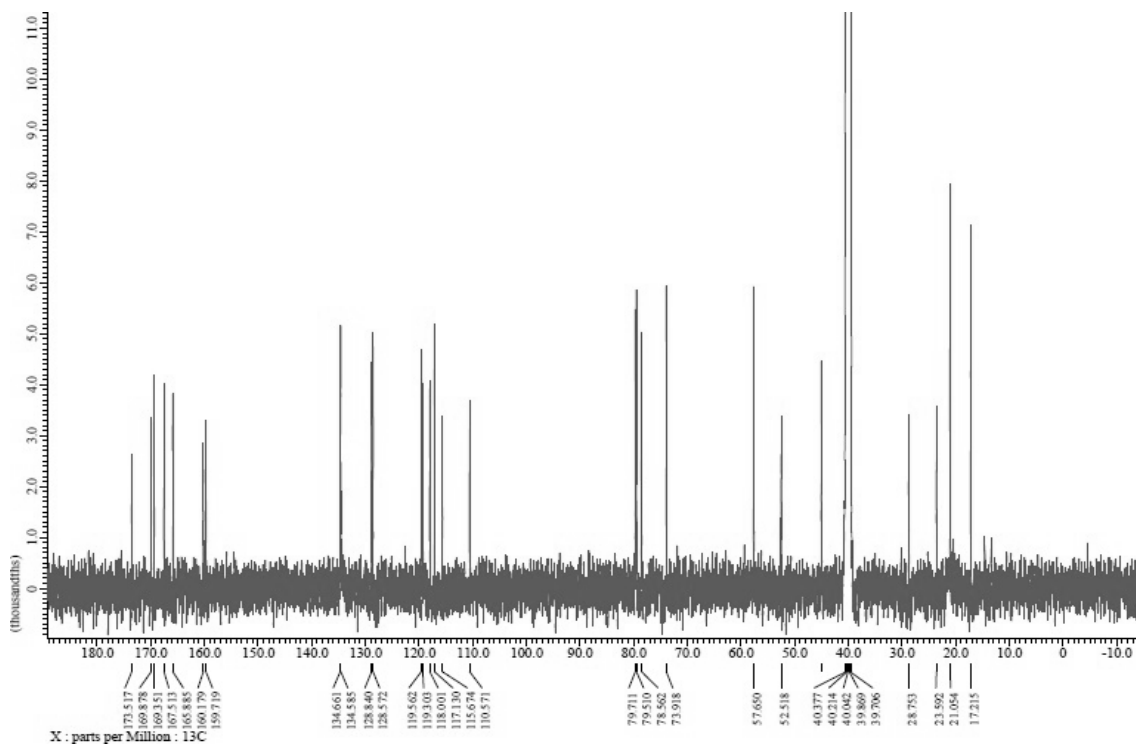

**Figure S2.** <sup>13</sup>C NMR spectrum of **1** (500 MHz, *d*<sub>6</sub>-DMSO)

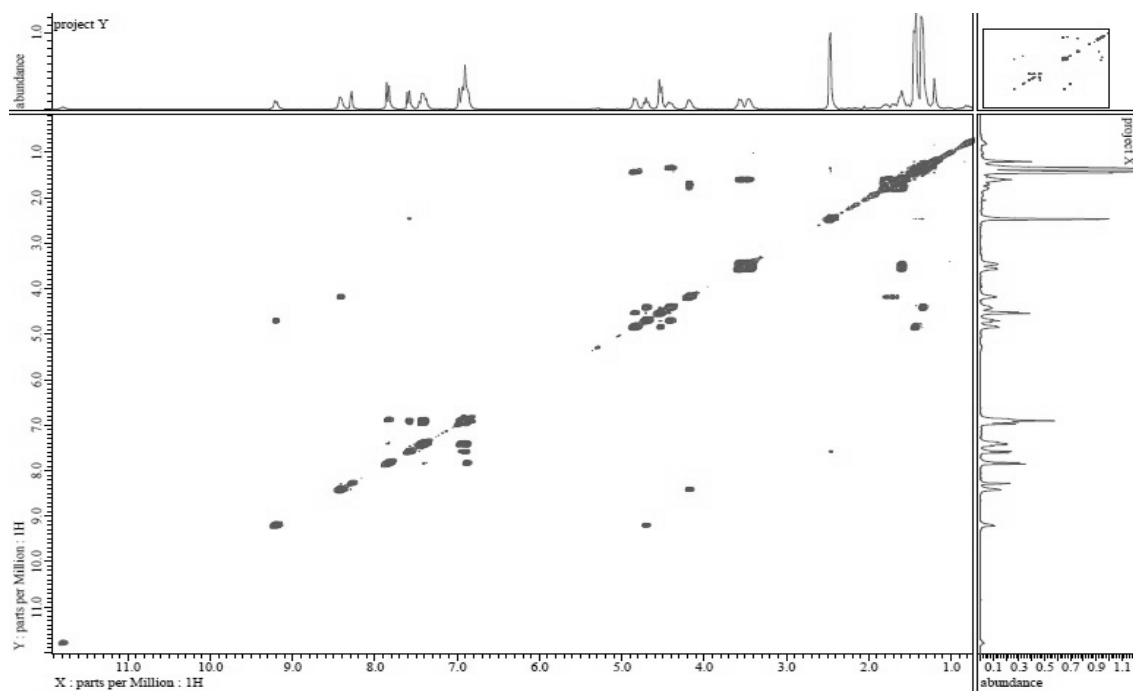

**Figure S3.** COSY spectrum of **1** (500 MHz,  $d_6$ -DMSO)

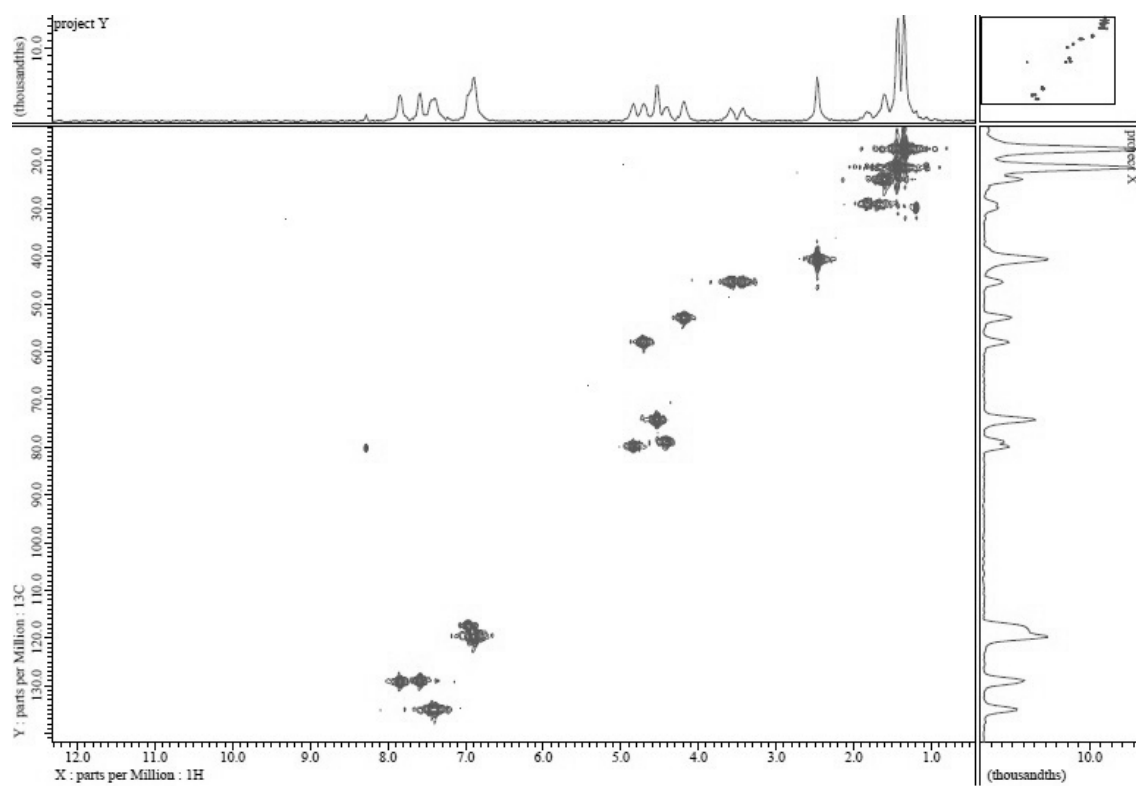

**Figure S4.** HMQC spectrum of **1** (500 MHz,  $d_6$ -DMSO)

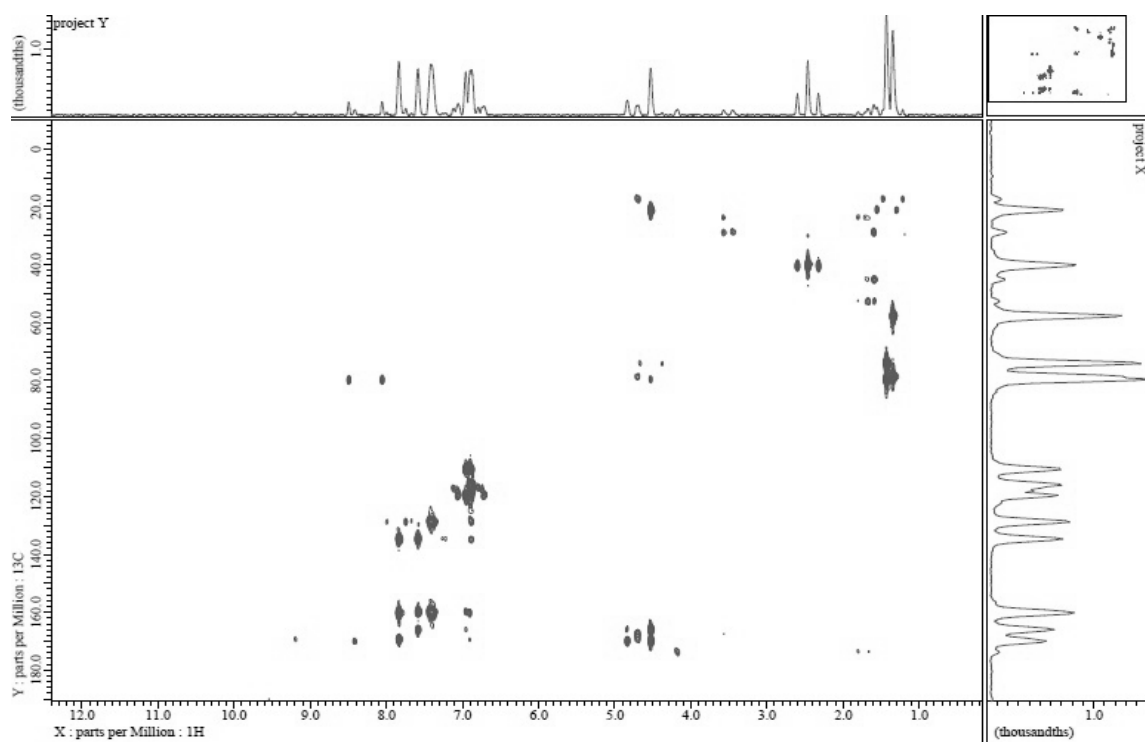

**Figure S5.** HMBC NMR spectrum of **1** (500 MHz,  $d_6$ -DMSO)

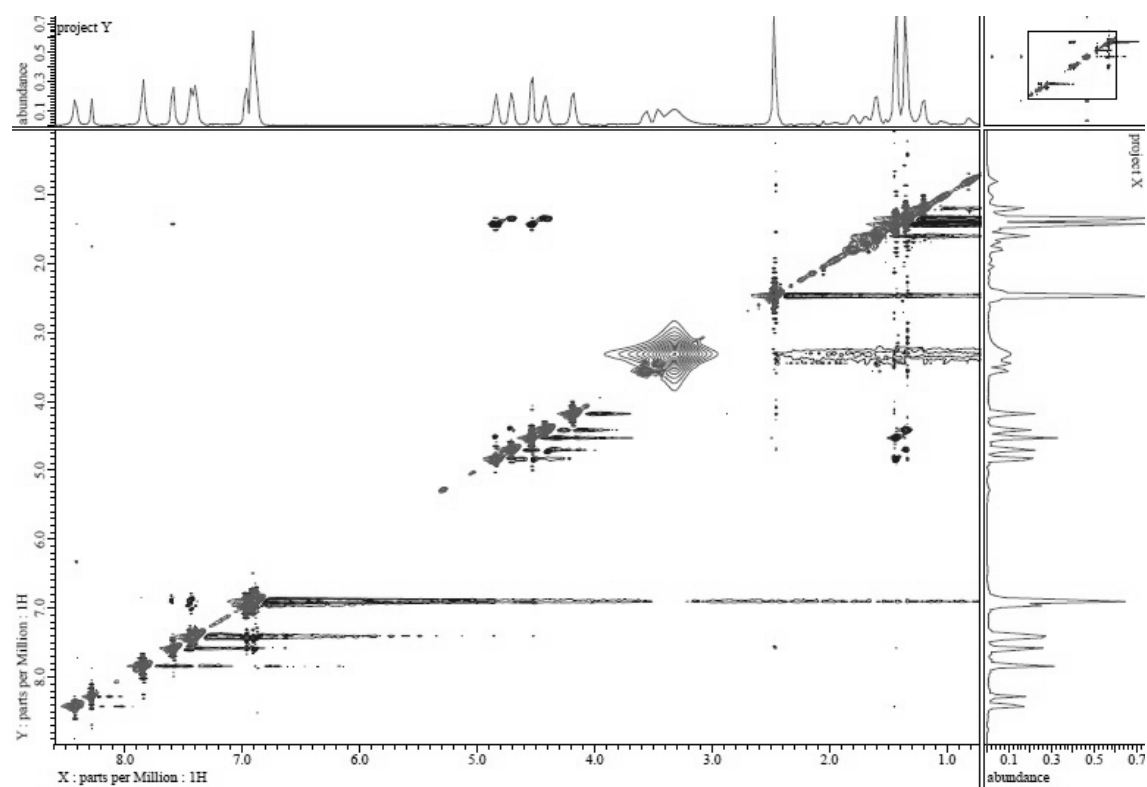

**Figure S6.** NOESY spectrum of **1** (500 MHz,  $d_6$ -DMSO)

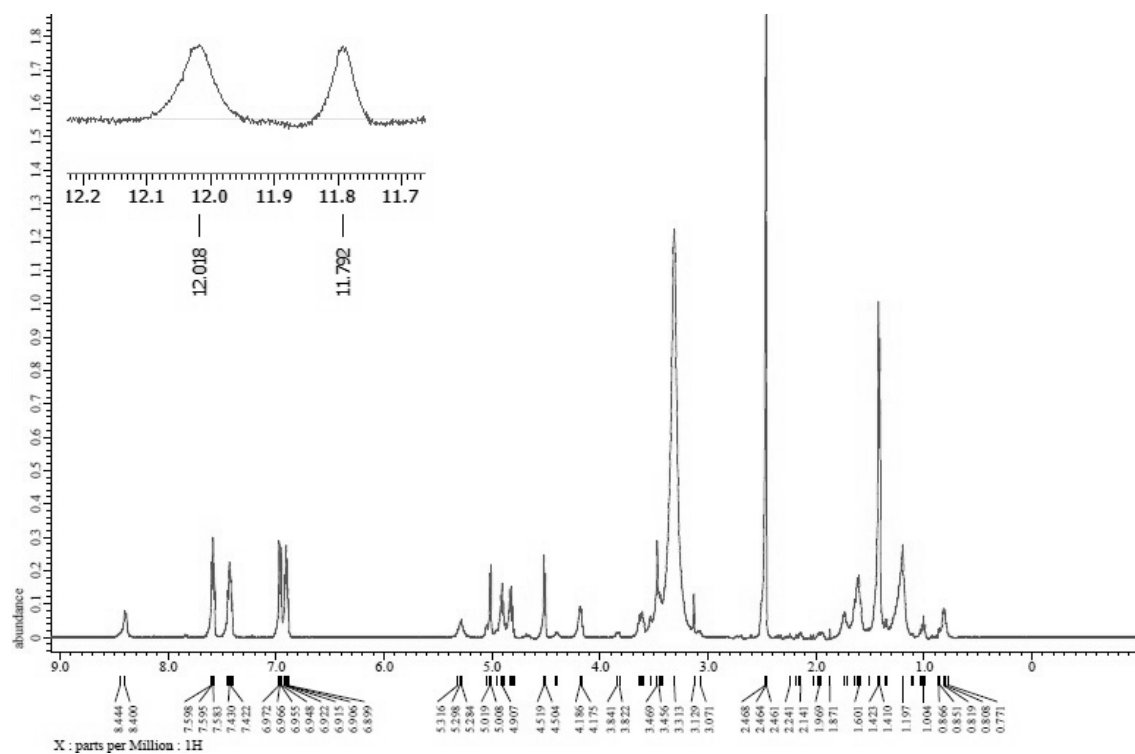

**Figure S7.** <sup>1</sup>H NMR spectrum of **2** (500 MHz, *d*<sub>6</sub>-DMSO)

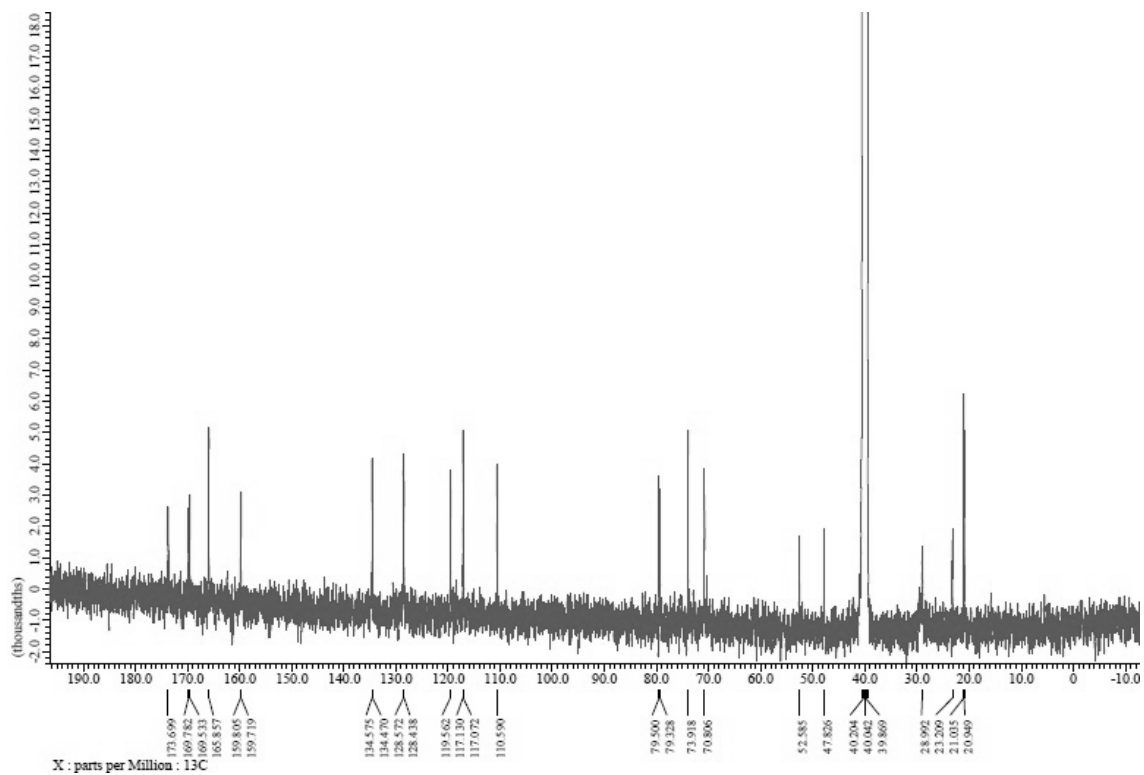

**Figure S8.** <sup>13</sup>C NMR spectrum of **1** (500 MHz, *d*<sub>6</sub>-DMSO)

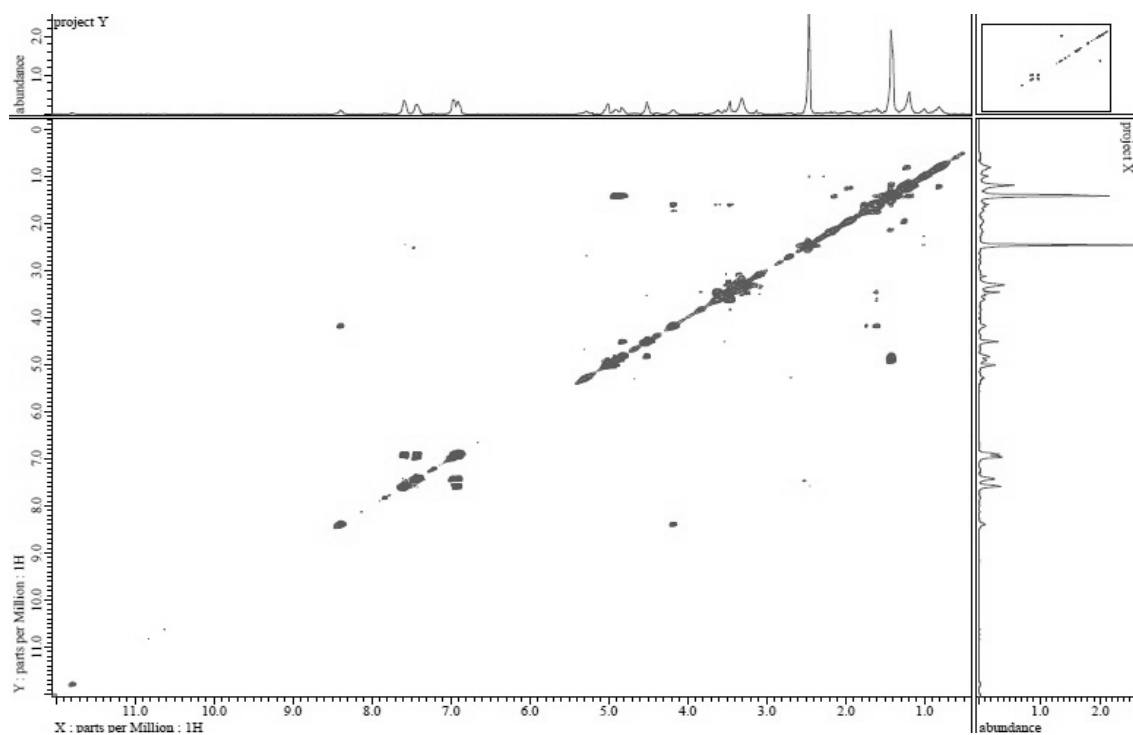

**Figure S9.** COSY spectrum of **2** (500 MHz,  $d_6$ -DMSO)

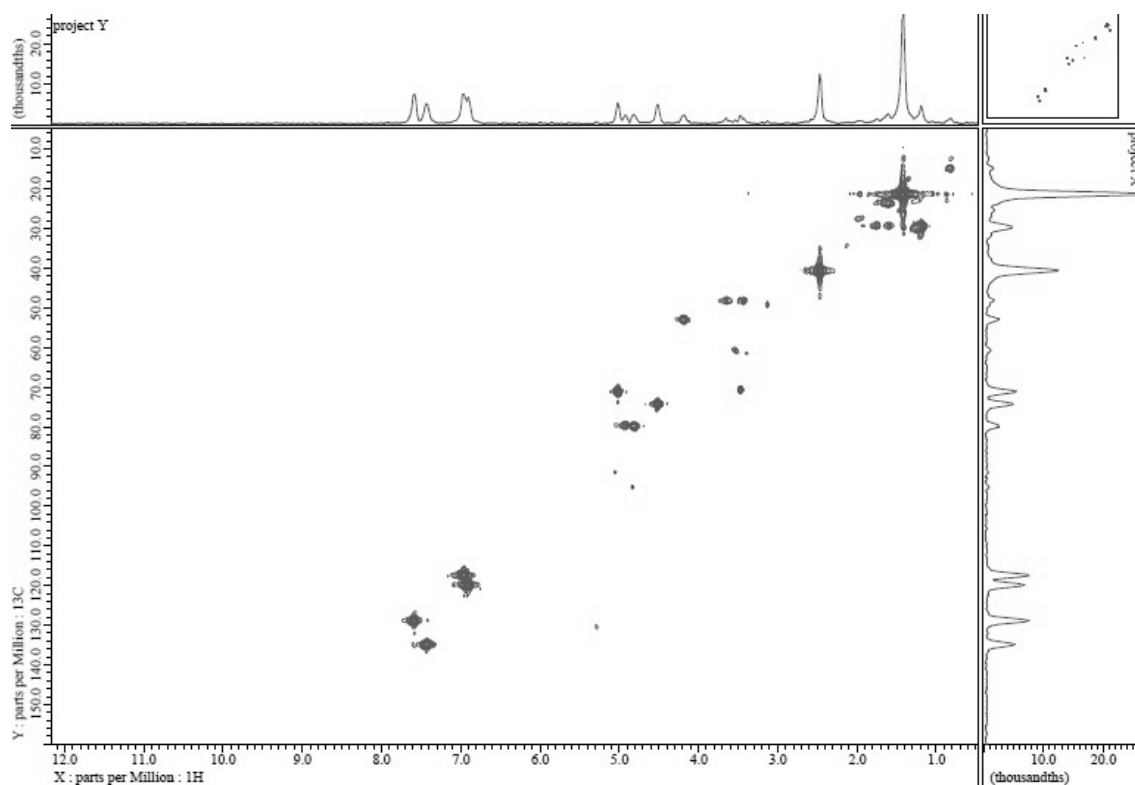

**Figure S10.** HMQC spectrum of **2** (500 MHz,  $d_6$ -DMSO)

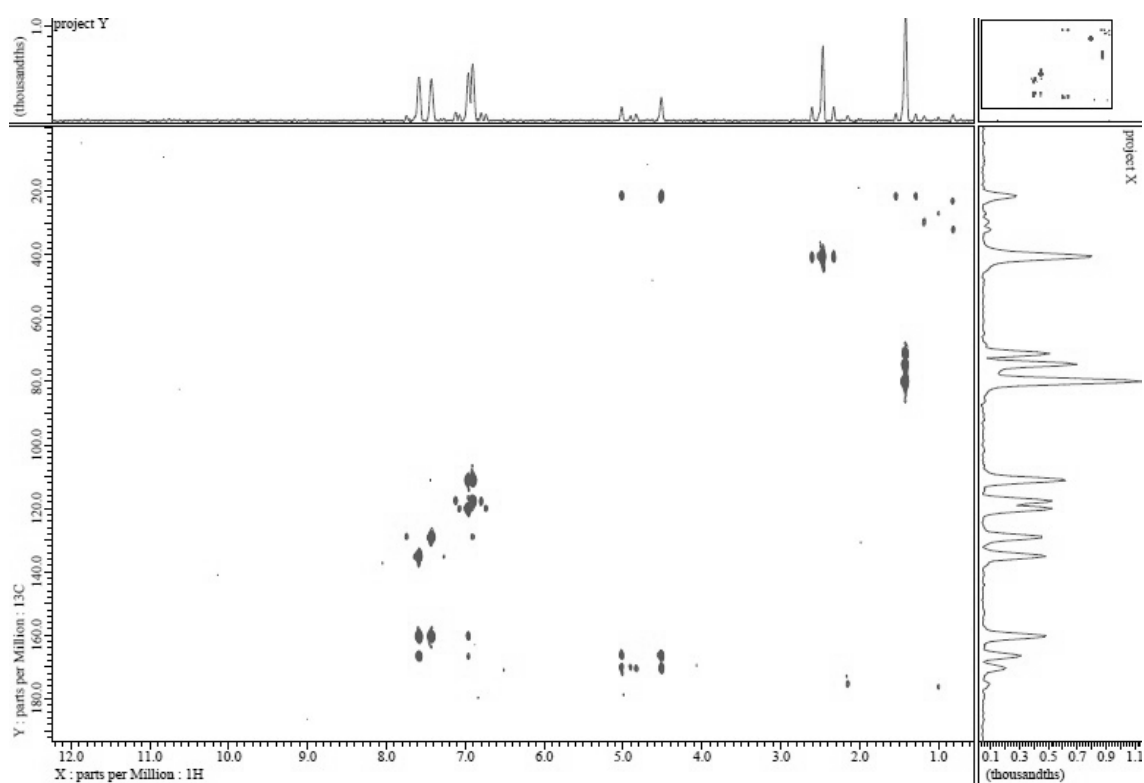

**Figure S11.** HMBC spectrum of **2** (500 MHz,  $d_6$ -DMSO)

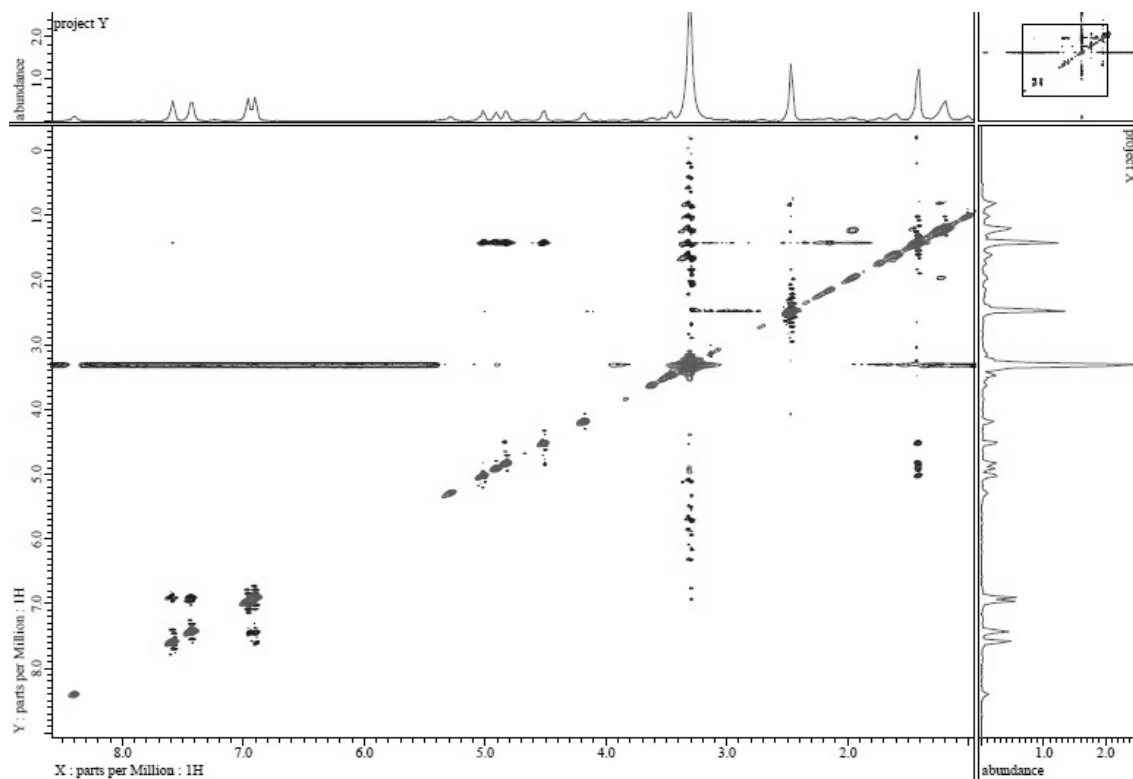

**Figure S12.** NOESY spectrum of **2** (500 MHz,  $d_6$ -DMSO)



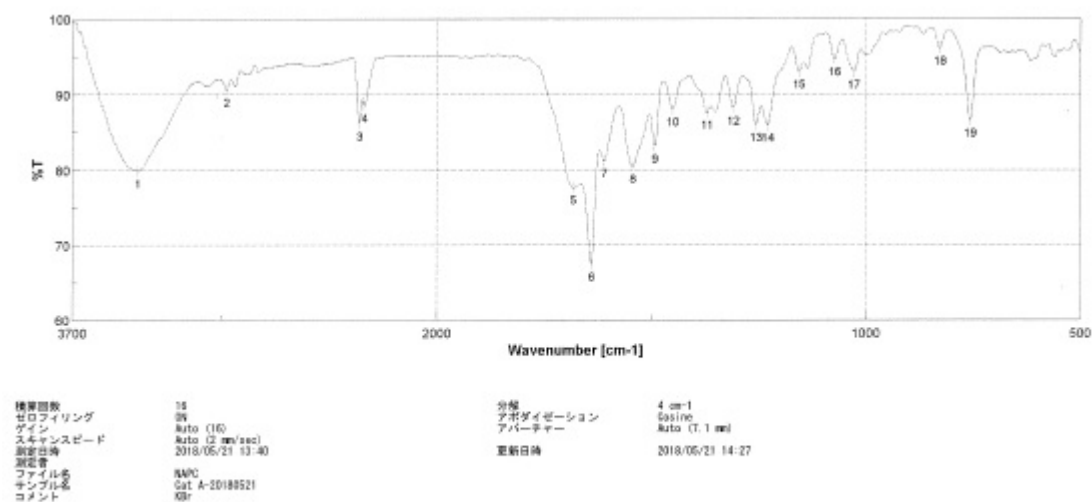

Figure S13. IR spectrum of 1

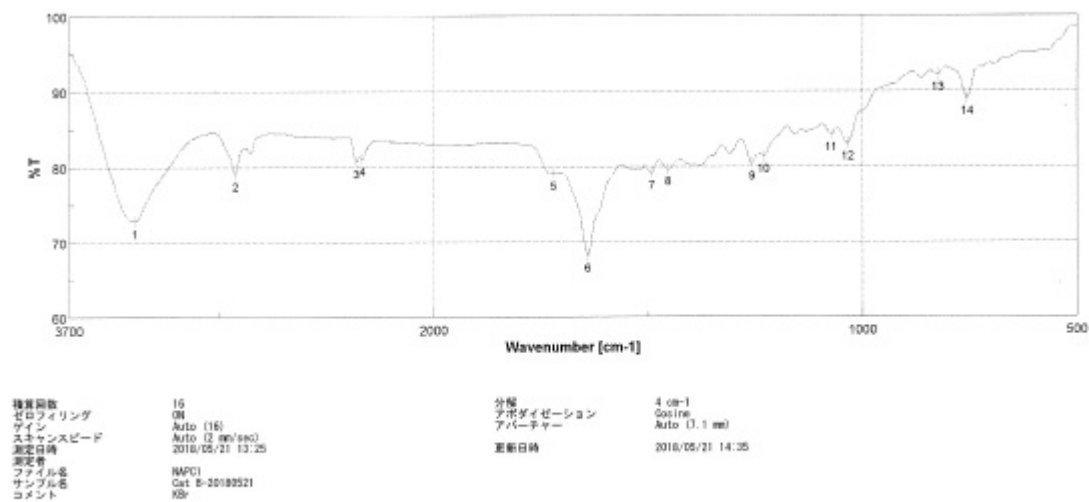

Figure S14. IR spectrum of 2

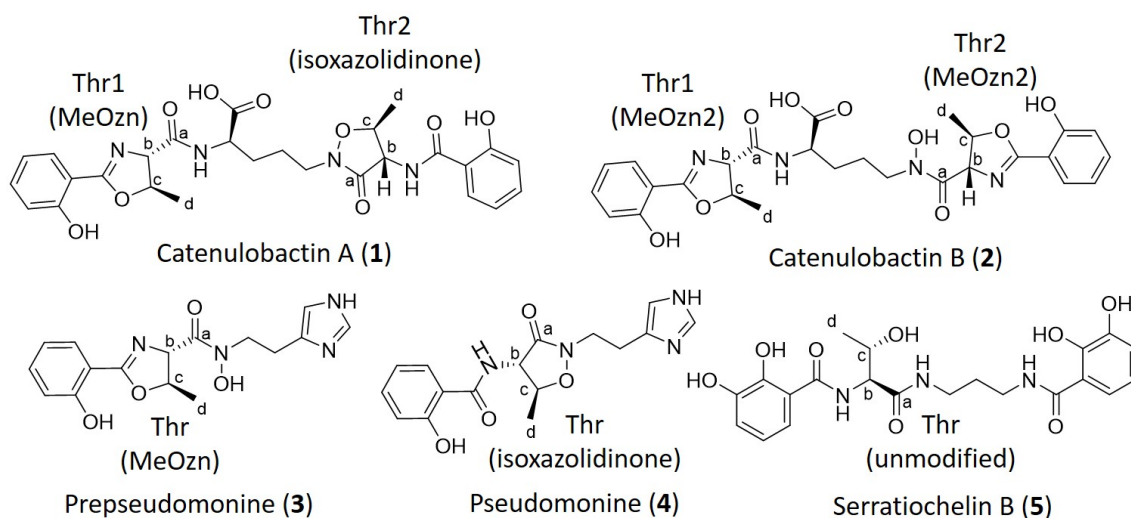

|          | <b>1</b> |       | <b>2</b> |       | <b>3</b> | <b>4</b> | <b>5</b> |
|----------|----------|-------|----------|-------|----------|----------|----------|
| position | Thr1     | Thr2  | Thr1     | Thr2  |          |          |          |
| a        | 169.9    | 167.6 | 169.8    | 169.5 | 165.2    | 167.3    | 173.2    |
| b        | 73.9     | 57.7  | 73.9     | 70.8  | 70.3     | 57.0     | 60.6     |
| c        | 79.5     | 78.6  | 79.5     | 79.3  | 78.7     | 77.8     | 68.1     |
| d        | 21.1     | 17.2  | 21.0     | 20.9  | 20.6     | 16.6     | 20.1     |

**Figure S15.**  $^{13}\text{C}$  NMR resonances of Thr residues in catenulobactins (**1** and **2**), pre-pseudomnine (**3**)<sup>1</sup>, pseudomnine (**4**)<sup>1</sup>, and serratiochelin B (**5**)<sup>2</sup>. The  $^{13}\text{C}$  NMR spectra of were all recorded in  $d_6$ -DMSO, except for the  $^{13}\text{C}$  NMR spectrum of **5** recorded in  $d_4$ -methanol.

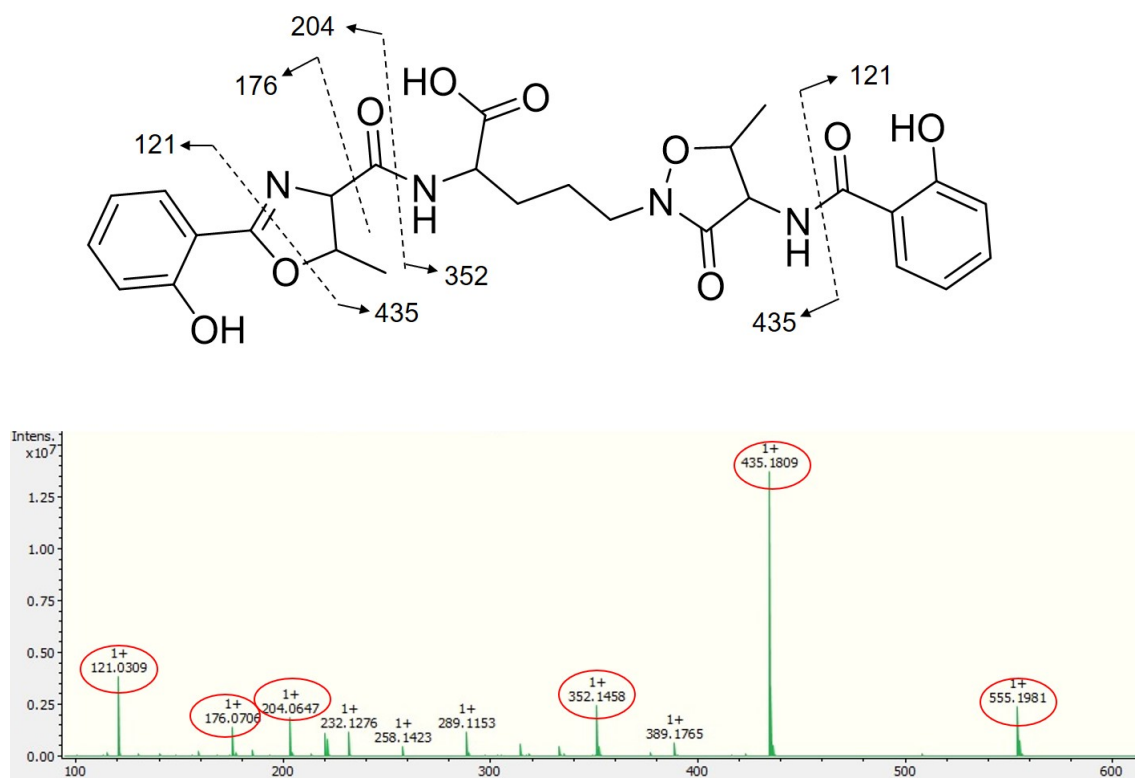

**Figure S16.** ESI-MS/MS analysis of **1**.

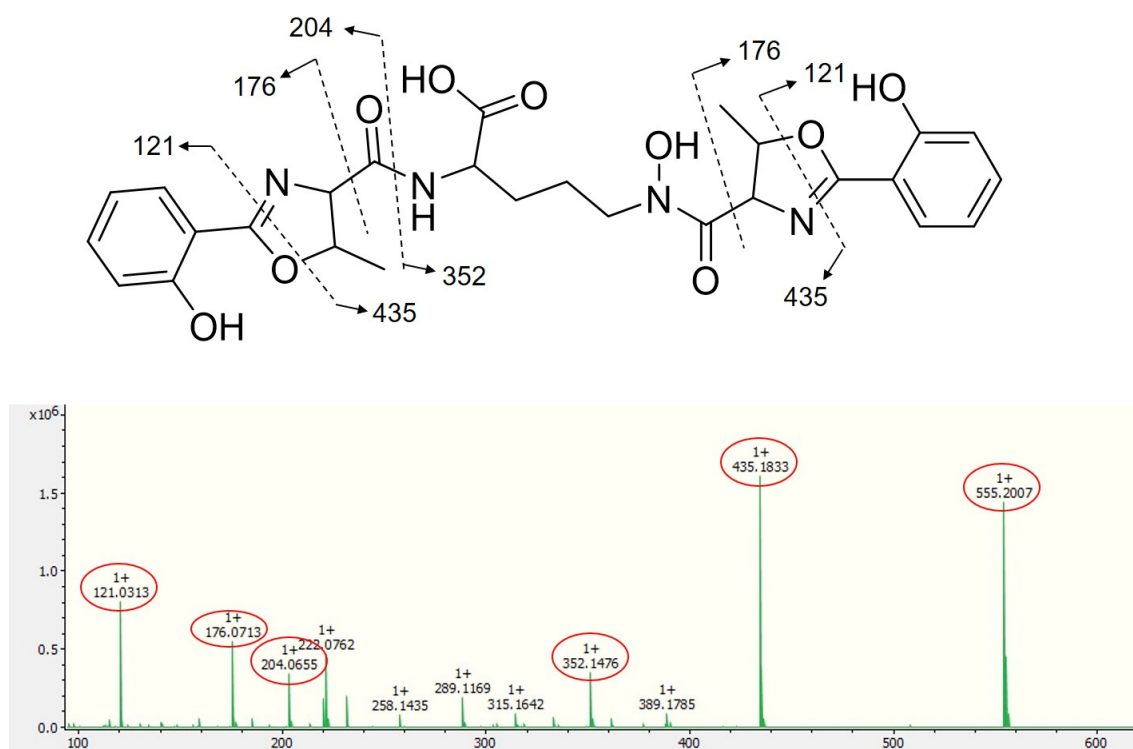

**Figure S17.** ESI-MS/MS analysis of **2**.

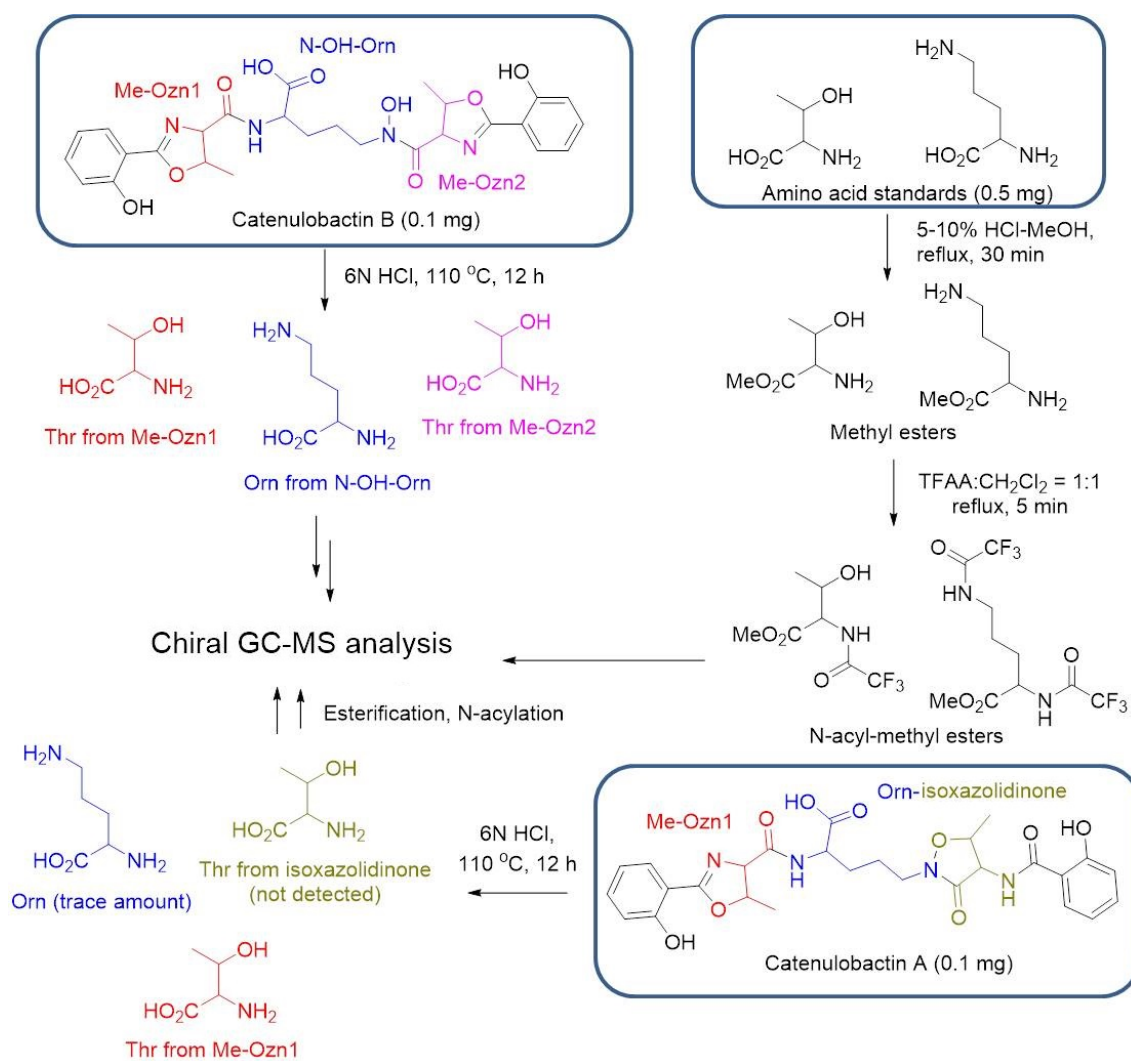

**Figure S18.** Outline for hydrolysis and chemical derivatization for GC-MS analysis.

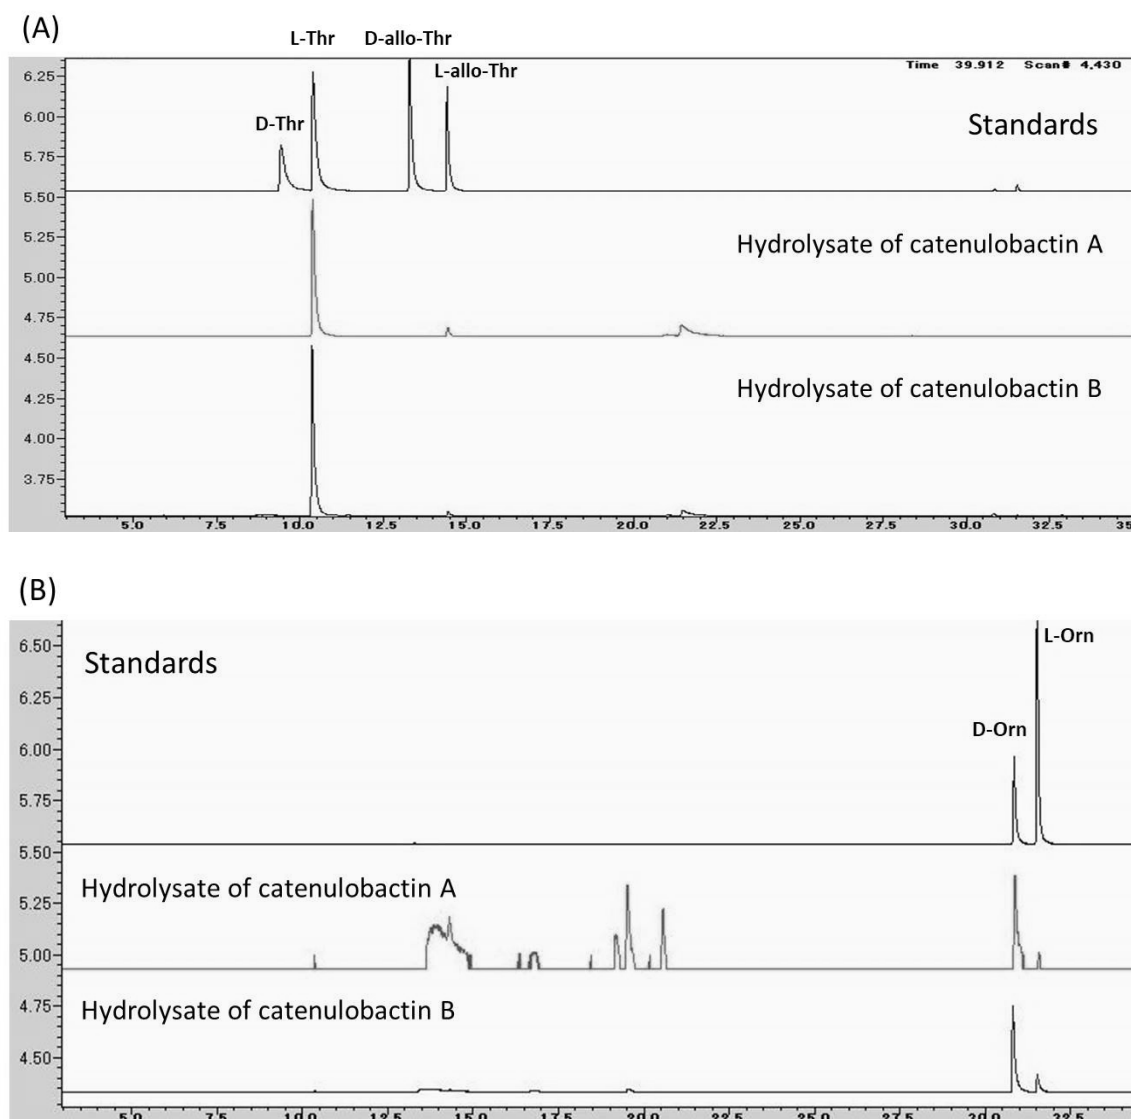

**Figure S19.** Chiral phase GC-MS chromatograms of amino acid standards and hydrolysates of catenulobactins derivatized with methyl ester and N-TFA. (A)  $m/z$  152 for detection of the threonine derivatives. (B)  $m/z$  166 for detection of the ornithine derivatives.

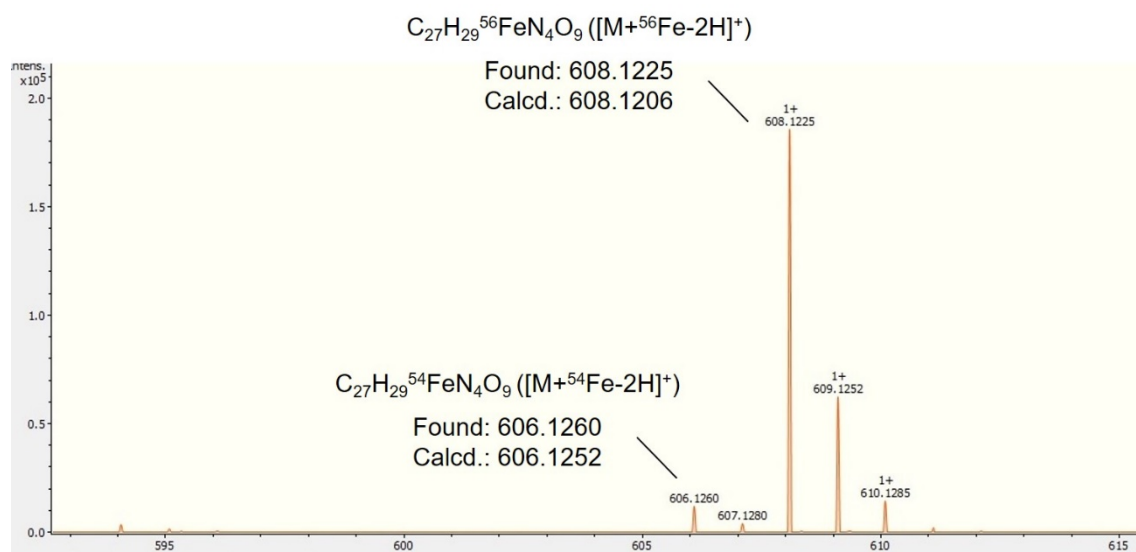

**Figure S20.** HR-ESI-MS spectrum of **2**-Fe(III) complex.

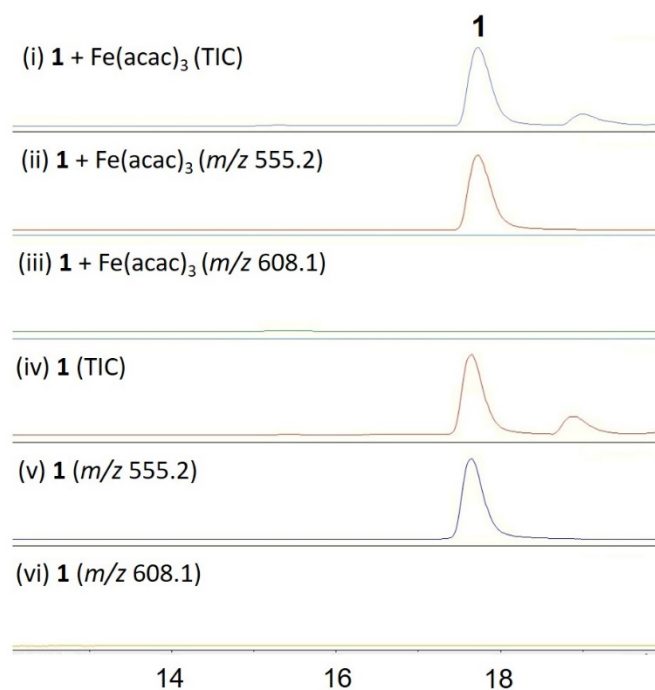

**Figure S21.** LC-MS charts of (i) total ion chromatogram (TIC) of **1** treated with  $\text{Fe}(\text{acac})_3$ , (ii) extracted ion chromatogram (EIC) of **1** treated with  $\text{Fe}(\text{acac})_3$  at  $m/z$  555.2 ( $[\text{M}+\text{H}]^+$ ), (iii) EIC of **1** treated with  $\text{Fe}(\text{acac})_3$  at  $m/z$  608.1 ( $[\text{M}+^{56}\text{Fe}-2\text{H}]^+$ ), (iv) TIC of **1** (untreated), (v) EIC of **1** (untreated) at  $m/z$  555.2, and (vi) EIC of **1** (untreated) at  $m/z$  608.1.



## References

- (1) Shapiro, J. A.; Wencewicz T. A. *Metallomics*. **2017**, *9*, 463-470.
- (2) Seyedsayamdost M. R.; Cleto, S.; Carr, G.; Vlamakis, H.; João Vieira, M.; Kolter, R.; Clardy, J. *J. Am Chem. Soc.* **2012**, *134*, 13550-13553.
